# Supplementary material for: Nisin lantibiotic prevents NAFLD liver steatosis and mitochondrial oxidative stress following periodontal disease by abrogating oral, gut and liver dysbiosis
Source: PubMed Central journal article supplement (PMC10794237; doi:10.1038/s41522-024-00476-x), 2024-01-17
Supplement: 41522_2024_476_MOESM1_ESM.pdf [file 41522_2024_476_MOESM1_ESM.pdf]

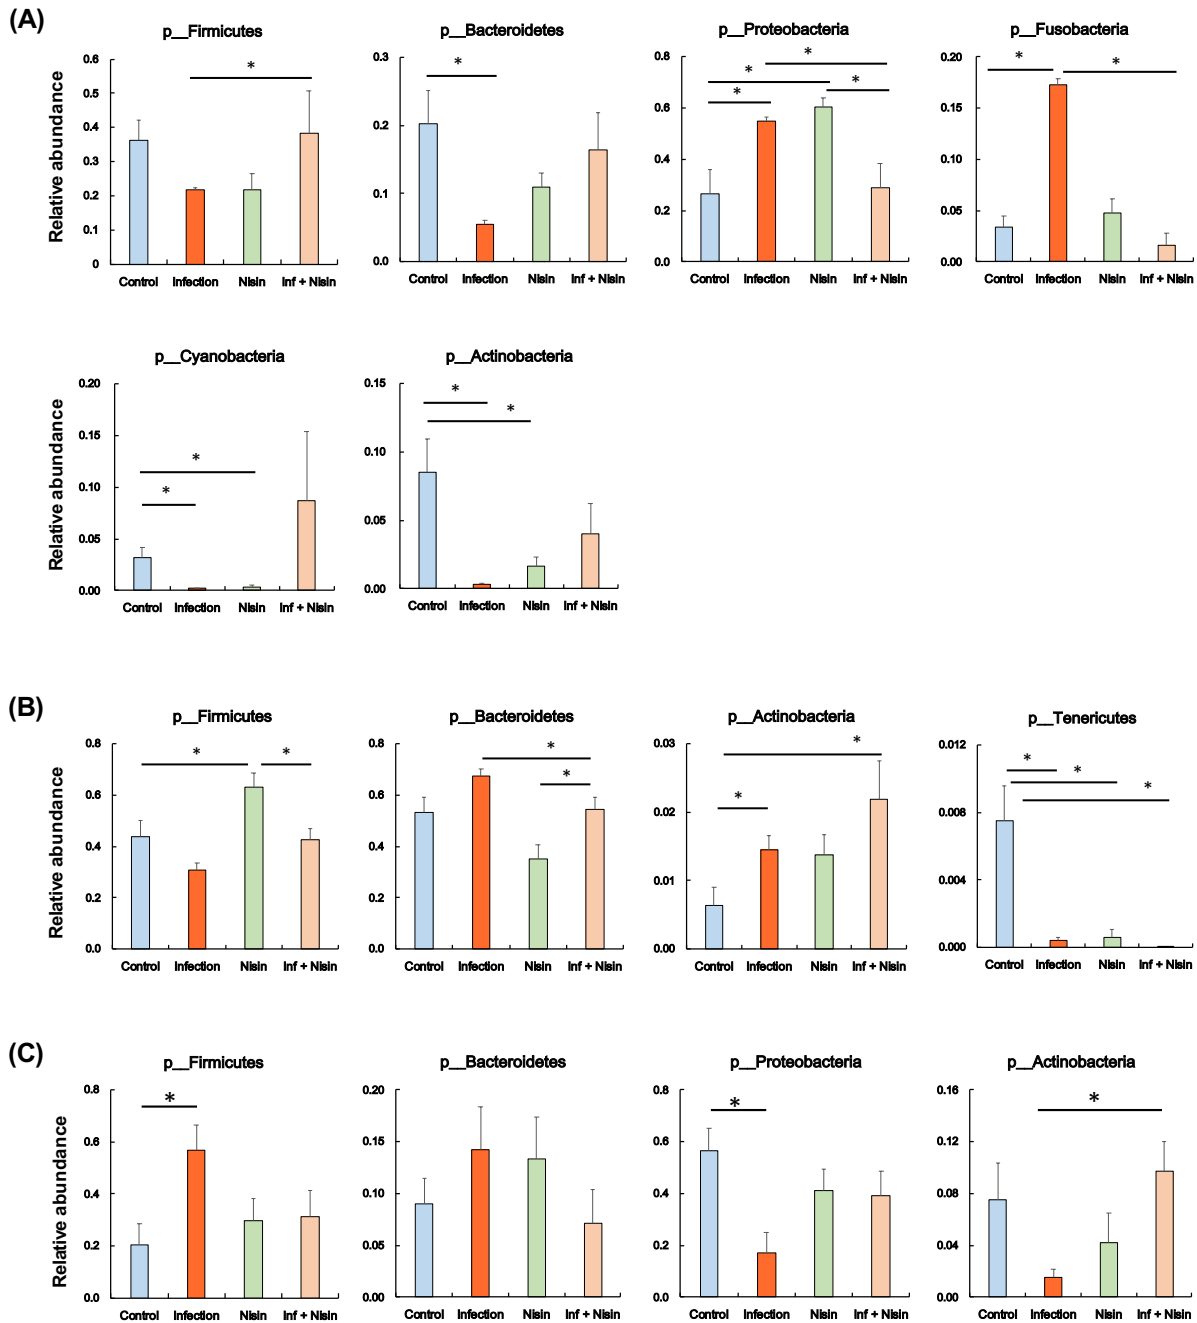

**Supplementary Figure 1.**

Between-group variation analysis of bacteria taxa at the phylum level in the oral (A), gut (B) and liver (C). The data in the bar graphs are shown as means  $\pm$  standard deviation. \* $p < 0.05$  between groups with Tukey test ( $n=6$ ).

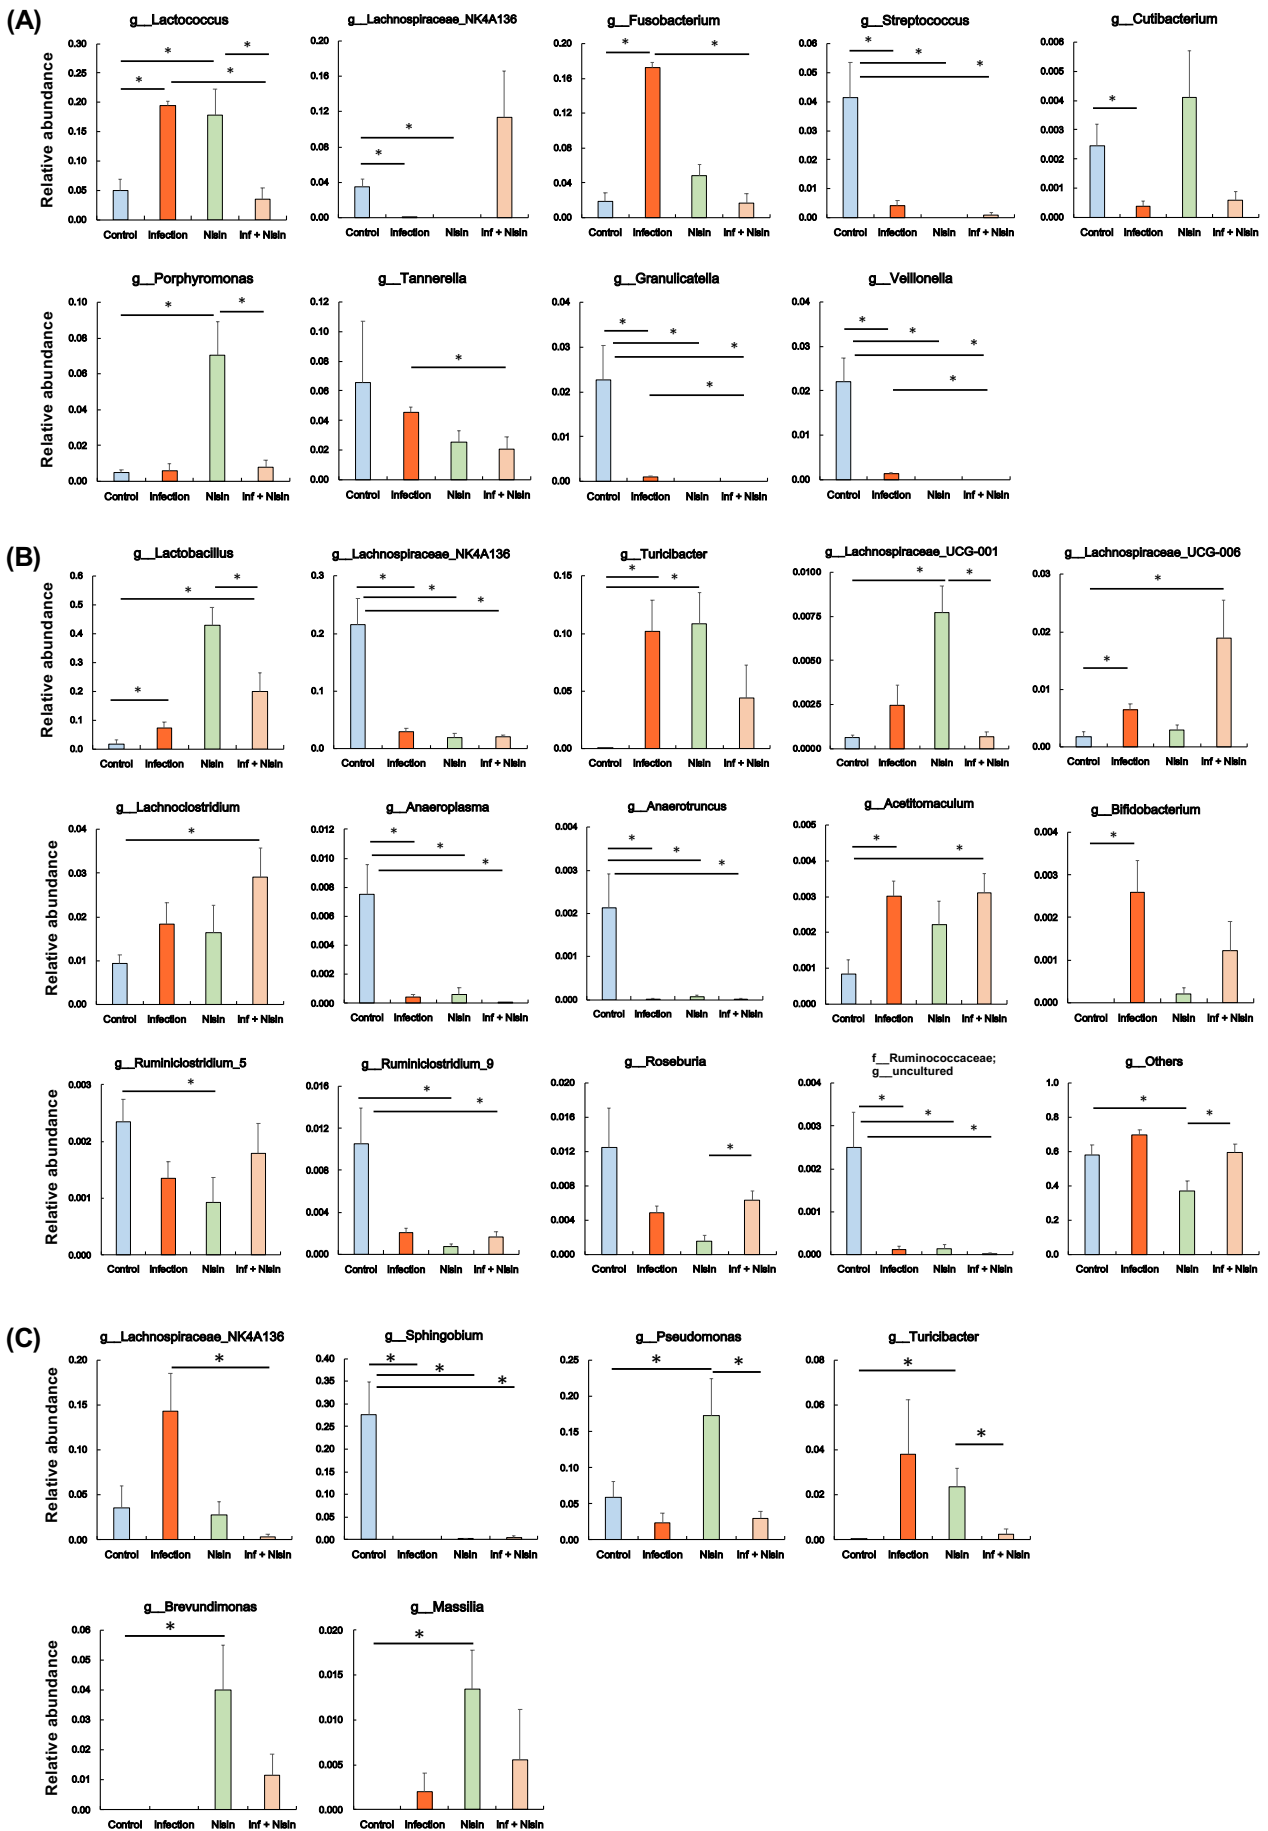

**Supplementary Figure 2.** Between-group variation analysis of bacteria taxa at the genus level in the oral (A), gut (B) and liver (C). The data in the bar graphs are shown as means  $\pm$  standard deviation. \* $p < 0.05$  between groups with Tukey test ( $n=6$ ).

### Oral cavity

### Small intestine

### Liver

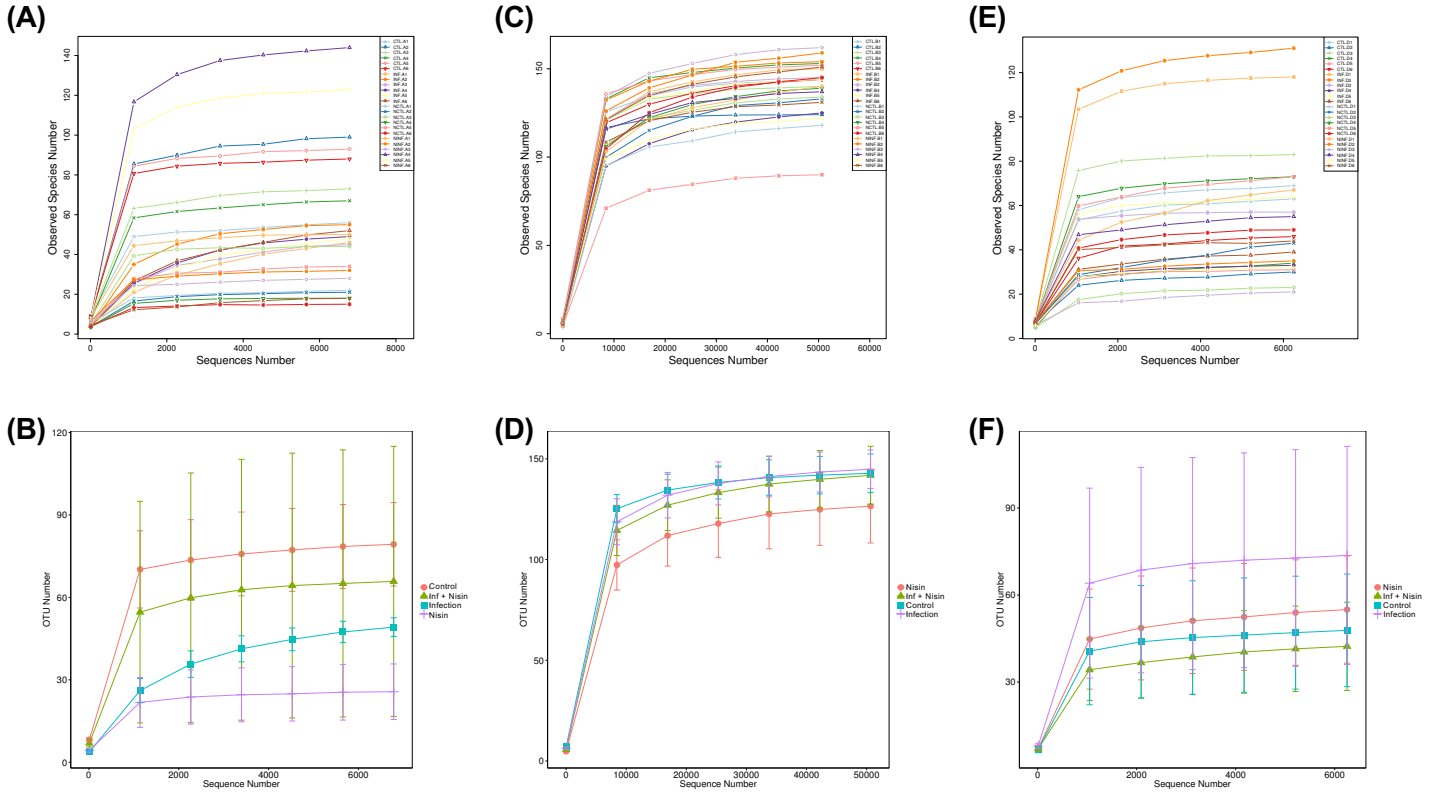

### Supplementary Figure 3.

Rarefaction curves of each sample (A, C, and E) and group (B, D, and F) in the oral cavity, small intestine, and liver (n=6).

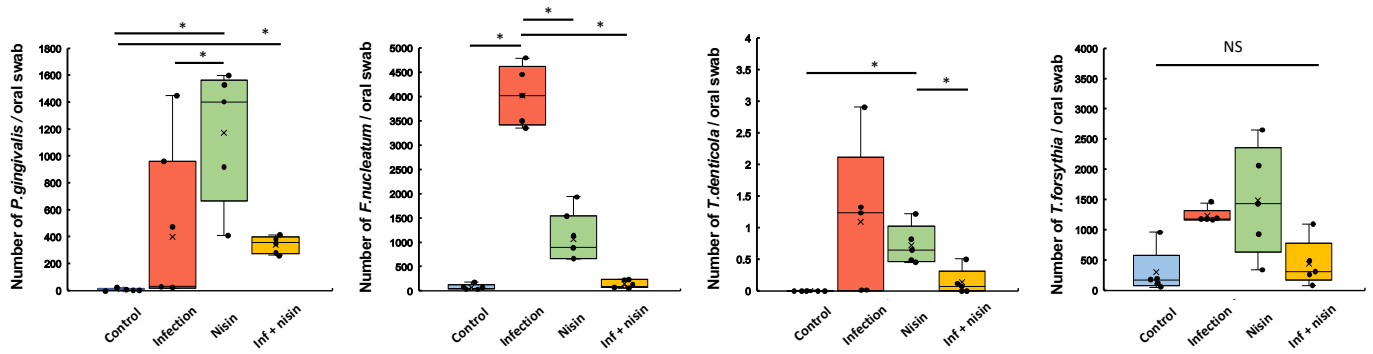

### Supplementary Figure 4.

The number of periodontal pathogens in oral cavity following polymicrobial infection and nisin treatment. Box-plots display the median, first quartiles (25th percentile), third quartiles (75th percentile), and minimum and maximum whiskers, with all data points plotted. \* $p < 0.05$  between groups with Tukey test (n=5).

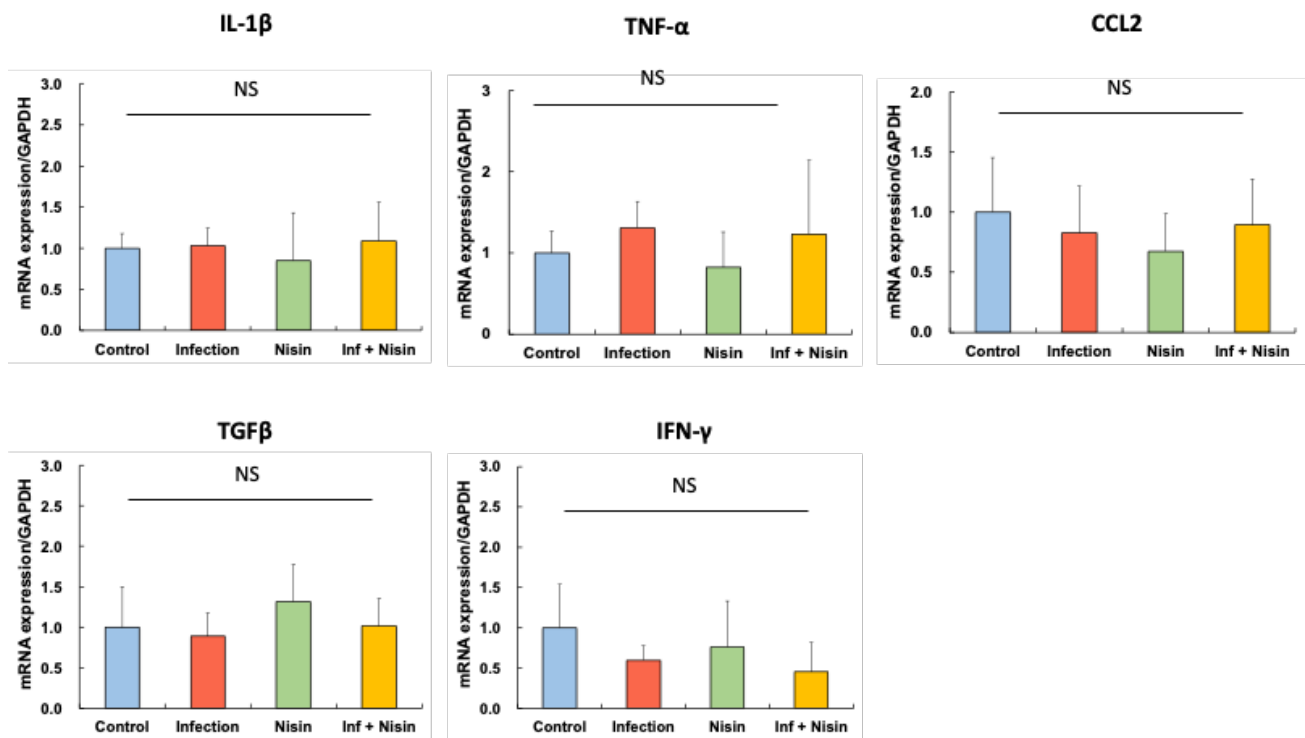

**Supplementary Figure 5.**

Gene Expression of Pro-inflammatory Cytokine in Periodontal Tissue. The data in the bar graphs are shown as means  $\pm$  standard deviation.

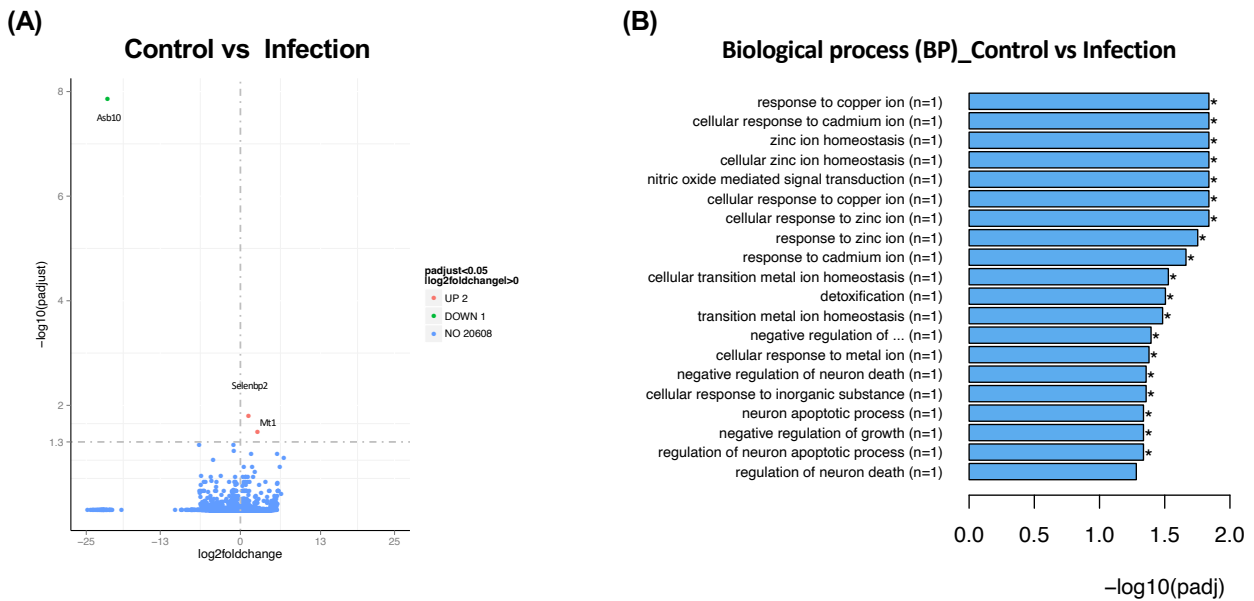

### Supplementary Figure 6.

Gene profile in liver tissue analyzed by RNA sequencing (n=6). **A)** Volcano plot revealed 3 DEGs (2 up-regulated and 1 down-regulated) between the control group and the infection group. **B)** Bar plot shows function of expressed genes for top 20 significantly enriched GO terms at biological process category, which were determined by ClusterProfiler (version 3.8.1).

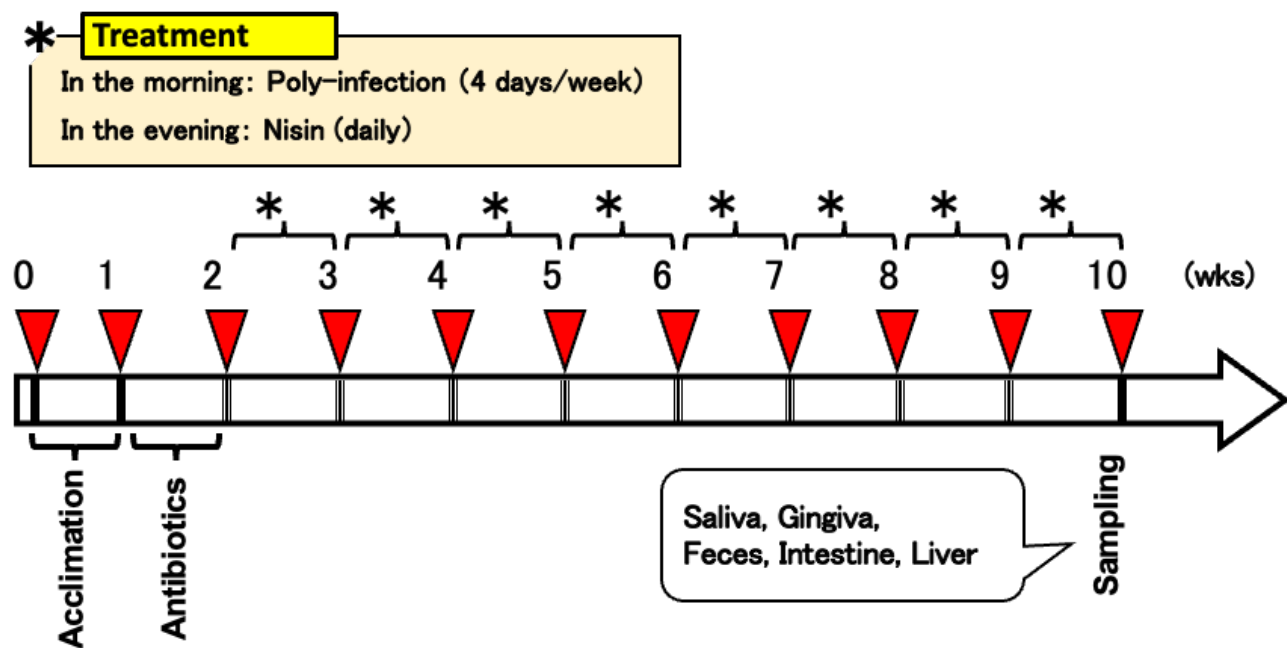

**Supplementary Figure 7.** Experimental design using polymicrobial infection animal model

**Supplementary Table 1. Microbial genera identified via 16S sequencing in the oral cavity, small intestine and liver; ranked by their relative abundance (from highest at the top to lowest at the bottom).**

| Oral                                                      | Small intestine                         | Liver                                   |
|-----------------------------------------------------------|-----------------------------------------|-----------------------------------------|
| <i>Massilia</i>                                           | <i>Lactobacillus</i>                    | <i>Sphingobium</i>                      |
| <i>Lactococcus</i>                                        | <i>Lachnospiraceae_NK4A136_group</i>    | <i>Lactobacillus</i>                    |
| <i>Lachnospiraceae_NK4A136_group</i>                      | <i>Turicibacter</i>                     | <i>Pseudomonas</i>                      |
| <i>Tannerella</i>                                         | <i>Alistipes</i>                        | <i>Lachnospiraceae_NK4A136_group</i>    |
| <i>Fusobacterium</i>                                      | <i>Lachnospiraceae_UCG-006</i>          | <i>Novosphingobium</i>                  |
| <i>Porphyromonas</i>                                      | <i>Enterorhabdus</i>                    | <i>Sphingomonas</i>                     |
| <i>Anaerococcus</i>                                       | <i>Candidatus_Saccharimonas</i>         | <i>Anoxybacillus</i>                    |
| <i>Staphylococcus</i>                                     | <i>Intestinimonas</i>                   | <i>Thermicanus</i>                      |
| <i>Brevundimonas</i>                                      | <i>Enterobacter</i>                     | <i>Thermus</i>                          |
| <i>Shimwellia</i>                                         | <i>uncultured Lachnospiraceae</i>       | <i>Collinsella</i>                      |
| <i>Pigmentiphaga</i>                                      | <i>Roseburia</i>                        | <i>Corynebacterium_1</i>                |
| <i>Dyadobacter</i>                                        | <i>Lachnospiraceae_A2</i>               | <i>Turicibacter</i>                     |
| <i>Streptococcus</i>                                      | <i>Ruminiclostridium</i>                | <i>Granulicatella</i>                   |
| <i>Corynebacterium_1</i>                                  | <i>Ruminiclostridium_9</i>              | <i>Staphylococcus</i>                   |
| <i>Pedobacter</i>                                         | <i>Oscillibacter</i>                    | <i>Lachnospiraceae_UCG-006</i>          |
| <i>Allorhizobium-Neorhizobium-Pararhizobium-Rhizobium</i> | <i>Lachnospiraceae_ASF356</i>           | <i>Methyloversatilis</i>                |
| <i>Hymenobacter</i>                                       | <i>Ruminococcaceae_UCG-014</i>          | <i>Alistipes</i>                        |
| <i>Anaeroplasma</i>                                       | <i>Blautia</i>                          | <i>Stenotrophomonas</i>                 |
| <i>Pseudomonas</i>                                        | <i>[Eubacterium]_xylanophilum_group</i> | <i>Prevotella_7</i>                     |
| <i>Neisseria</i>                                          | <i>Clostridium_sensu_stricto_1</i>      | <i>Bradyrhizobium</i>                   |
| <i>Phytophthora_lateralis_MPF4</i>                        | <i>Anaeroplasma</i>                     | <i>Alkanindiges</i>                     |
| <i>Lactobacillus</i>                                      | <i>Lachnospiraceae_UCG-001</i>          | <i>Brevundimonas</i>                    |
| <i>Prevotellaceae_UCG-001</i>                             | <i>GCA-900066575</i>                    | <i>Tepidiphilus</i>                     |
| <i>Atopobium</i>                                          | <i>Candidatus_Arthromitus</i>           | <i>uncultured Caldilineaceae</i>        |
| <i>Roseburia</i>                                          | <i>Tyzzereella_3</i>                    | <i>uncultured Lachnospiraceae</i>       |
| <i>uncultured Lachnospiraceae</i>                         | <i>Enterococcus</i>                     | <i>[Eubacterium]_xylanophilum_group</i> |
| <i>Megasphaera</i>                                        | <i>Anaerotruncus</i>                    | <i>Enterorhabdus</i>                    |
| <i>Granulicatella</i>                                     | <i>Acetitomaculum</i>                   | <i>Hydrogenophaga</i>                   |
| <i>uncultured_Bacteroidales_bacterium</i>                 | <i>Stenotrophomonas</i>                 | <i>Acinetobacter</i>                    |
| <i>Mogibacterium</i>                                      | <i>uncultured Ruminococcaceae</i>       | <i>Paenibacillus</i>                    |
| <i>Prevotella_7</i>                                       | <i>uncultured Peptococcaceae</i>        | <i>Prevotella_6</i>                     |
| <i>Leptotrichia</i>                                       | <i>Bifidobacterium</i>                  | <i>Dechloromonas</i>                    |
| <i>Aeromicrobium</i>                                      | <i>Ruminiclostridium_5</i>              | <i>Candidatus_Alysiosphaera</i>         |
| <i>Bacteroides</i>                                        |                                         | <i>Flavobacterium</i>                   |

(Continues)



**Supplementary Table 1**

|                                        |                                     |                                                   |
|----------------------------------------|-------------------------------------|---------------------------------------------------|
| <i>Veillonella</i>                     | <i>Ruminiclostridium_6</i>          | <i>Burkholderia-Caballeronia-Paraburkholderia</i> |
| <i>Peptoniphilus</i>                   | <i>Bacteroides</i>                  | <i>Ruminiclostridium_9</i>                        |
| <i>Noviherbaspirillum</i>              | <i>Streptococcus</i>                | <i>Aeromonas</i>                                  |
| <i>Tepidimonas</i>                     | <i>Acetatifactor</i>                | <i>Roseburia</i>                                  |
| <i>Intestinimonas</i>                  | <i>Prevotellaceae_UCG-001</i>       | <i>Lachnospiraceae_GCA-900066575</i>              |
| <i>Lawsonella</i>                      | <i>Parvibacter</i>                  | <i>Cloacibacterium</i>                            |
| <i>Lachnospiraceae_UCG-006</i>         | <i>Ruminococcaceae_UCG-009</i>      | <i>Peptoniphilus</i>                              |
| <i>Alloprevotella</i>                  | <i>Cenchrus_americanus</i>          | <i>Lactococcus</i>                                |
| <i>Alistipes</i>                       | <i>Sphingomonas</i>                 | <i>Streptococcus</i>                              |
| <i>Devosia</i>                         | <i>Rhodobacter</i>                  | <i>Rothia</i>                                     |
| <i>Corynebacterium</i>                 | <i>Lachnospiraceae_FCS020_group</i> | <i>Lachnoclostridium</i>                          |
| <i>Methyloversatilis</i>               | <i>Pseudomonas</i>                  | <i>Ruminococcaceae_UCG-014</i>                    |
| <i>Youngiibacter</i>                   | <i>Methylobacterium</i>             | <i>Methylomonaceae_pLW-20</i>                     |
| <i>Sphingomonas</i>                    | <i>Harryflintia</i>                 | <i>Massilia</i>                                   |
| <i>Haemophilus</i>                     | <i>[Eubacterium]_brachy_group</i>   | <i>Sporichthyaceae_hgcI_clade</i>                 |
| <i>Micrococcus</i>                     | <i>Marvinbryantia</i>               | <i>Kocuria</i>                                    |
| <i>Ruminococcaceae_UCG-014</i>         | <i>Ruminococcaceae_UCG-010</i>      | <i>Ruminococcus_1</i>                             |
| <i>Escherichia-Shigella</i>            | <i>Alloprevotella</i>               | <i>Ruminococcaceae_UCG-004</i>                    |
| <i>uncultured Caulobacteraceae</i>     | <i>Others</i>                       | <i>Methylobacterium</i>                           |
| <i>Actinomyces</i>                     |                                     | <i>Bacillus</i>                                   |
| <i>Caulobacter</i>                     |                                     | <i>Rickettsiella</i>                              |
| <i>Methylobacterium</i>                |                                     | <i>Cutibacterium</i>                              |
| <i>Nocardioides</i>                    |                                     | <i>Veillonella</i>                                |
| <i>Lachnoclostridium</i>               |                                     | <i>Anaerococcus</i>                               |
| <i>Rhodococcus</i>                     |                                     | <i>Lachnospiraceae_A2</i>                         |
| <i>Enterorhabdus</i>                   |                                     | <i>Ruminiclostridium_5</i>                        |
| <i>[Eubacterium]_xylanophilumgroup</i> |                                     | <i>Sediminibacterium</i>                          |
| <i>uncultured Veillonellaceae</i>      |                                     | <i>Anaeroplasma</i>                               |
| <i>Prevotella_6</i>                    |                                     | <i>uncultured Diplorickettsiaceae</i>             |
| <i>Rothia</i>                          |                                     | <i>Roseomonas</i>                                 |
| <i>Chryseobacterium</i>                |                                     | <i>Neisseria</i>                                  |
| <i>Cetobacterium</i>                   |                                     | <i>Pantoea</i>                                    |
| <i>Gemella</i>                         |                                     | <i>Micrococcus</i>                                |
| <i>uncultured Neisseriaceae</i>        |                                     | <i>Megamonas</i>                                  |
| <i>Stomatobaculum</i>                  |                                     | <i>Limnohabitans</i>                              |
| <i>Thermicanus</i>                     |                                     | <i>Alloprevotella</i>                             |
| <i>Ruminiclostridium</i>               |                                     | <i>uncultured Chitinophagaceae</i>                |
| <i>Marvinbryantia</i>                  |                                     | <i>Micromonospora</i>                             |

(Continues)

**Supplementary Table 1**

|                                                 |  |                                                 |
|-------------------------------------------------|--|-------------------------------------------------|
| <i>Brachybacterium</i>                          |  | <i>uncultured Peptococcaceae</i>                |
| <i>Cytophaga</i>                                |  | <i>Lachnospiraceae_UCG-001</i>                  |
| <i>Flavobacterium</i>                           |  | <i>Pseudoxanthomonas</i>                        |
| <i>uncultured Cyclobacteriaceae</i>             |  | <i>Romboutsia</i>                               |
| <i>Lachnospiraceae_A2</i>                       |  | <i>Gaiella</i>                                  |
| <i>Oscillibacter</i>                            |  | <i>Candidatus_Saccharimonas</i>                 |
| <i>Enterococcus</i>                             |  | <i>Enhydrobacter</i>                            |
| <i>Cutibacterium</i>                            |  | <i>Fodinicola</i>                               |
| <i>Stenotrophomonas</i>                         |  | <i>Leptotrichia</i>                             |
| <i>TM7_phylum_sp._oral_clone_FR058</i>          |  | <i>Haemophilus</i>                              |
| <i>Ilumatobacteraceae_CL500-29 marine group</i> |  | <i>Caulobacter</i>                              |
| <i>Solobacterium</i>                            |  | <i>Lautropia</i>                                |
| <i>Actinocatenispora</i>                        |  | <i>Corynebacterium</i>                          |
| <i>Ralstonia</i>                                |  | <i>Acetitomaculum</i>                           |
| <i>Blautia</i>                                  |  | <i>Bosea</i>                                    |
| <i>Belnapia</i>                                 |  | <i>Enterococcus</i>                             |
| <i>Novosphingobium</i>                          |  | <i>Porphyromonas</i>                            |
| <i>Acetatifactor</i>                            |  | <i>Blautia</i>                                  |
| <i>Prevotella</i>                               |  | <i>Chryseobacterium</i>                         |
| <i>Hyphomicrobium</i>                           |  | <i>[Eubacterium]_coprostanoligenes_group</i>    |
| <i>Acetitomaculum</i>                           |  | <i>uncultured Veillonellaceae</i>               |
| <i>uncultured Rhizobiaceae</i>                  |  | <i>Lawsonella</i>                               |
| <i>Salinicoccus</i>                             |  | <i>Fastidiosipila</i>                           |
| <i>Lachnospiraceae_UCG-001</i>                  |  | <i>Geobacillus</i>                              |
| <i>Vibrionimonas</i>                            |  | <i>uncultured Neisseriaceae</i>                 |
| <i>Ruminiclostridium_5</i>                      |  | <i>Conexibacter</i>                             |
| <i>Brevibacterium</i>                           |  | <i>Paracoccus</i>                               |
| <i>[Eubacterium]_coprostanoligenes_group</i>    |  | <i>uncultured Ruminococcaceae</i>               |
| <i>Georgenia</i>                                |  | <i>Actinotalea</i>                              |
| <i>uncultured_Clostridiales_bacterium</i>       |  | <i>Proteiniphilum</i>                           |
| <i>Truepera</i>                                 |  | <i>Ruminiclostridium</i>                        |
| <i>Aegilops_tauschii</i>                        |  | <i>Acetobacterium</i>                           |
| <i>Peptostreptococcus</i>                       |  | <i>Butyrivibrio</i>                             |
| <i>Lachnospiraceae_ASF356</i>                   |  | <i>Ilumatobacteraceae_CL500-29 marine group</i> |
| <i>Paenibacillus</i>                            |  | <i>Phytophthora_lateralis_MPF4</i>              |
| <i>Brevibacillus</i>                            |  | <i>Pedobacter</i>                               |
| <i>Catonella</i>                                |  | <i>Prevotella_9</i>                             |

(Continues)

**Supplementary Table 1**

|                                           |                                                                  |
|-------------------------------------------|------------------------------------------------------------------|
| <i>Lachnospiraceae_GCA-900066575</i>      | <i>uncultured_Anaerolineaceae_bacterium</i>                      |
| <i>Geobacillus</i>                        | <i>Undibacterium</i>                                             |
| <i>Thioclava</i>                          | <i>Lachnospiraceae_ASF356</i>                                    |
| <i>Blastococcus</i>                       | <i>uncultured_Sandaracinaceae</i>                                |
| <i>Turicibacter</i>                       | <i>Ruminococcaceae_UCG-013</i>                                   |
| <i>Limnohabitans</i>                      | <i>Ruminiclostridium_6</i>                                       |
| <i>Thermomonas</i>                        | <i>uncultured_Verrucomicrobiaceae</i>                            |
| <i>Parvimonas</i>                         | <i>Marmoricola</i>                                               |
| <i>Rhodocyclaceae_C39</i>                 | <i>Christensenellaceae_R-7_group</i>                             |
| <i>Ruminococcus_1</i>                     | <i>uncultured_Microscillaceae</i>                                |
| <i>Phreatobacter</i>                      | <i>Spirochaetaceae_GWE2-31-10</i>                                |
| <i>Acinetobacter</i>                      | <i>Prevotella</i>                                                |
| <i>Fodinicola</i>                         | <i>Tepidimonas</i>                                               |
| <i>Bacillus</i>                           | <i>Prevotella_2</i>                                              |
| <i>Porphyrobacter</i>                     | <i>Nocardioides</i>                                              |
| <i>Eikenella</i>                          | <i>Leptospira</i>                                                |
| <i>Pantoea</i>                            | <i>Lachnospiraceae_FCS020_group</i>                              |
| <i>Treponema_2</i>                        | <i>Oribacterium</i>                                              |
| <i>Spirosoma</i>                          | <i>Actinomyces</i>                                               |
| <i>Medicago_truncatula_(barrel_medic)</i> | <i>Thauera</i>                                                   |
| <i>Curvibacter</i>                        | <i>Anaerotruncus</i>                                             |
| <i>Capnocytophaga</i>                     | <i>Atopobium</i>                                                 |
| <i>Lachnospiraceae_FCS020_group</i>       | <i>Weissella</i>                                                 |
| <i>uncultured_Ruminococcaceae</i>         | <i>Bacteriovorax</i>                                             |
| <i>Psychrobacter</i>                      | <i>Polyangium</i>                                                |
| <i>Tetrasphaera</i>                       | <i>Shuttleworthia</i>                                            |
| <i>Alloscardovia</i>                      | <i>Candidatus_Firestonebacteria_bacterium_RIFOXYA2_FULL_40_8</i> |
| <i>Tyzzereella_3</i>                      | <i>Dyella</i>                                                    |
| <i>uncultured_Peptococcaceae</i>          | <i>uncultured_Bacteriovorax_sp.</i>                              |
| <i>Ruminiclostridium_6</i>                | <i>uncultured_Erysipelotrichaceae</i>                            |
| <i>Lachnoanaerobaculum</i>                | <i>Clostridium_sensu_stricto_1</i>                               |
| <i>Deinococcus</i>                        | <i>Ruminococcaceae_UCG-009</i>                                   |
| <i>Family_XIII_AD3011_group</i>           | <i>Oscillibacter</i>                                             |
| <i>Cloacibacterium</i>                    | <i>Marvinbryantia</i>                                            |
| <i>Anoxybacillus</i>                      | <i>groundwater_metagenome</i>                                    |
| <i>Tyzzereella</i>                        | <i>Stomatobaculum</i>                                            |
| <i>Anaerotruncus</i>                      | <i>Allorhizobium-Neorhizobium-Pararhizobium-Rhizobium</i>        |

(Continues)

**Supplementary Table 1**

|                                      |  |                                      |
|--------------------------------------|--|--------------------------------------|
| <i>[Eubacterium]_nodatum_group</i>   |  | <i>Ruminococcaceae_UCG-010</i>       |
| <i>Butyricicoccus</i>                |  | <i>Eikenella</i>                     |
| <i>Parvibacter</i>                   |  | <i>Ruminococcaceae_GCA-900066225</i> |
| <i>Family_XIII_UCG-001</i>           |  | <i>Harryflintia</i>                  |
| <i>Ruminococcaceae_NK4A214_group</i> |  | <i>Escherichia-Shigella</i>          |
| <i>Ruminococcaceae_UCG-010</i>       |  | <i>Blastococcus</i>                  |
| <i>[Eubacterium]_brachy_group</i>    |  | <i>Streptomyces</i>                  |
| <i>Campylobacter</i>                 |  | <i>Others</i>                        |
| <i>Ruminococcaceae_UCG-004</i>       |  |                                      |
| <i>Polynucleobacter</i>              |  |                                      |
| <i>Paenalcaligenes</i>               |  |                                      |
| <i>Prevotellaceae_UCG-003</i>        |  |                                      |
| <i>Murdochiella</i>                  |  |                                      |
| <i>Thermovirga</i>                   |  |                                      |
| <i>Others</i>                        |  |                                      |

**Supplementary Table 2. Individual characteristics of the cadavers.**

| <b>Age</b> | <b>Sex</b> | <b>No of remaining teeth<br/>(maxilla/mandible)</b> | <b>Cause of death</b>                          | <b>Other underlying diseases</b>                   |
|------------|------------|-----------------------------------------------------|------------------------------------------------|----------------------------------------------------|
| 80         | Female     | 12 (4/8)                                            | Senility                                       |                                                    |
| 80         | Female     | 13 (7/6)                                            | Transverse colon cancer                        |                                                    |
| 85         | Female     | 15 (7/8)                                            | Pancreatic cancer                              |                                                    |
| 85         | Male       | 12 (12/0)                                           | Lung cancer                                    |                                                    |
| 86         | Male       | 29 (15/14)                                          | Senility                                       |                                                    |
| 86         | Male       | 26 (12/14)                                          | Senility                                       | Transverse colon cancer                            |
| 86         | Male       | 22 (9/13)                                           | Acute exacerbation of<br>chronic renal failure |                                                    |
| 89         | Male       | 25 (13/12)                                          | Pneumonia                                      |                                                    |
| 91         | Male       | 21 (9/12)                                           | Senility                                       |                                                    |
| 92         | Female     | 25 (13/12)                                          | Brain stem hemorrhage                          | High blood pressure                                |
| 94         | Male       | 26 (14/12)                                          | Lethal irregular veins                         |                                                    |
| 99         | Female     | 27 (13/14)                                          | Senility                                       | Alzheimer's disease and<br>advanced gastric cancer |

**Supplementary Table 3. PCR primers and probe used for periodontal pathogens and total bacteria.**

| Bacterium                       | Sequence (5'-3')                                  |
|---------------------------------|---------------------------------------------------|
| <i>Porphyromonas gingivalis</i> | F: TAGCTTGCTAAGGTCGATGG                           |
|                                 | R: CAAGTGTATGCGGTTTTAGT                           |
|                                 | P: [6-FAM] TGC GTAACGCGTATGCAACTTGCC [TAMRA]      |
| <i>Fusobacterium nucleatum</i>  | F: CGCAGAAGGTGAAAGTCCTGTAT                        |
|                                 | R: TGGTCCTCACTGATTCACACAGA                        |
|                                 | P: [6-FAM] ACTTTGCTCCCAAGTAACATGGAACACGAG [TAMRA] |
| <i>Treponema denticola</i>      | F: TAAGGGCGGCTTGAAATAATAATG                       |
|                                 | R: AGAGCAAGCTCTCCCTTACCGT                         |
|                                 | P: [6-FAM] CAGCGTTCGTTCTGAGCCAGGATCA [TAMRA]      |
| <i>Tannerella forsythia</i>     | F: CGACGGAGAGTGAGAGCTTTCT                         |
|                                 | R: GCGCTCGTTATGGCACTTAAG                          |
|                                 | P: [6-FAM] CGTCTATGTAGGTGCTGCATGGTTGTCG [TAMRA]   |
| Universal (total bacteria)      | F: TGC GGGACTTAACCCAACA                           |
|                                 | R: TGGAGCATGTGGTTTAATTCGA                         |
|                                 | P: [6-FAM] CACGAGCTGACGACARC* [TAMRA]             |

F, forward primer; R, reverse primer; P, Taqman probe

\* "R" indicates mixed sequence of A and G bases.
